# Supplementary material for: Biofluid metabotyping of occupationally exposed subjects to air pollution demonstrates high oxidative stress and deregulated amino acid metabolism
Source: PubMed Central journal article supplement (PMC5073280; doi:10.1038/srep35972), 2016-10-21
Supplement: srep35972-s1.pdf [file srep35972-s1.pdf]

1 Supplementary Information

2 **Biofluid metabotyping of occupationally exposed subjects to air pollution demonstrates**  
3 **high oxidative stress and deregulated amino acid metabolism.**

4 Surya Narayan Pradhan<sup>1,2</sup>, Aleena Das<sup>3</sup>, Ramovatar Meena<sup>1</sup>, Ranjan Kumar Nanda<sup>3,\*</sup>, Paulraj  
5 Rajamani<sup>1,\*</sup>

6 <sup>1</sup>School of Environmental Sciences, Jawaharlal Nehru University, New Delhi, India

7 <sup>2</sup>School of Life Sciences, Sambalpur University, Sambalpur, India

8 <sup>3</sup>Immunology Group, International Centre for Genetic Engineering and Biotechnology (ICGEB),  
9 New Delhi, India

10

11

12

13

14

15

16

17

18

19

20

21

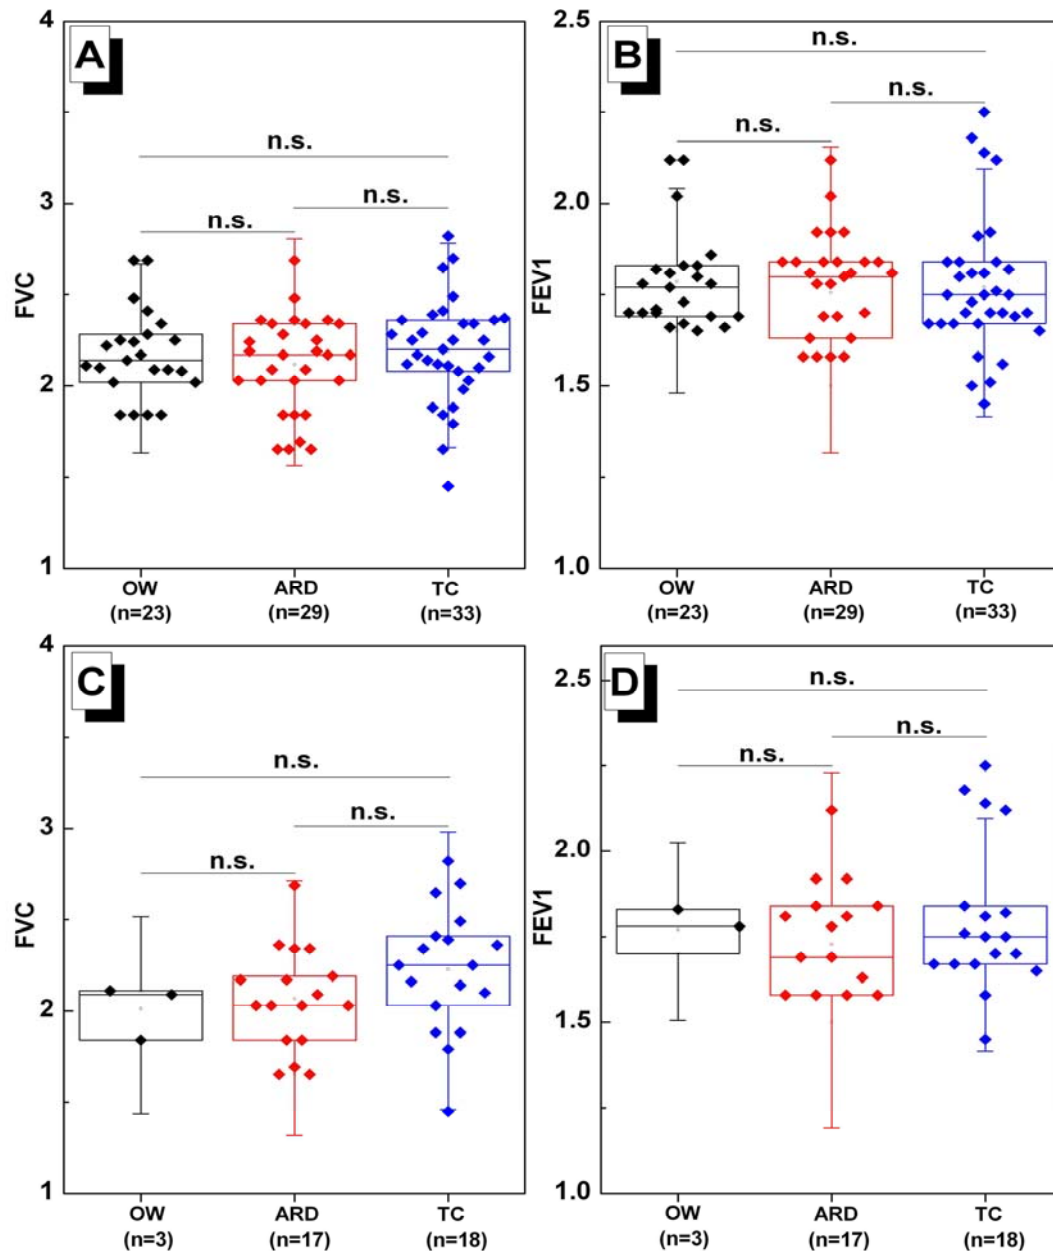

41

42 **Figure S1:** Respiratory parameters of all study subjects belonging to office worker (OW), auto  
 43 rickshaw driver (ARD), and traffic cop (TC) groups showed similar profile. Box and whisker  
 44 plot of (A) Forced Vital Capacity (FVC); (B) Forced Expiratory Volume in 1 sec (FEV<sub>1</sub>) of OW  
 45 (n=23), ARD (n=29) and TC (n=33); (C) FVC and (D) FEV<sub>1</sub> of Smokers OW (n=3), ARD  
 46 (n=17) and TC (n=18) shows insignificant difference between the study groups (n.s.: not  
 47 significant at 95% confidence of Wilcoxon-Mann-Whitney test). Black diamond shows OW  
 48 subjects, red for ARD and blue diamond's for TC. Number of subjects used in this study is  
 49 presented in parenthesis.

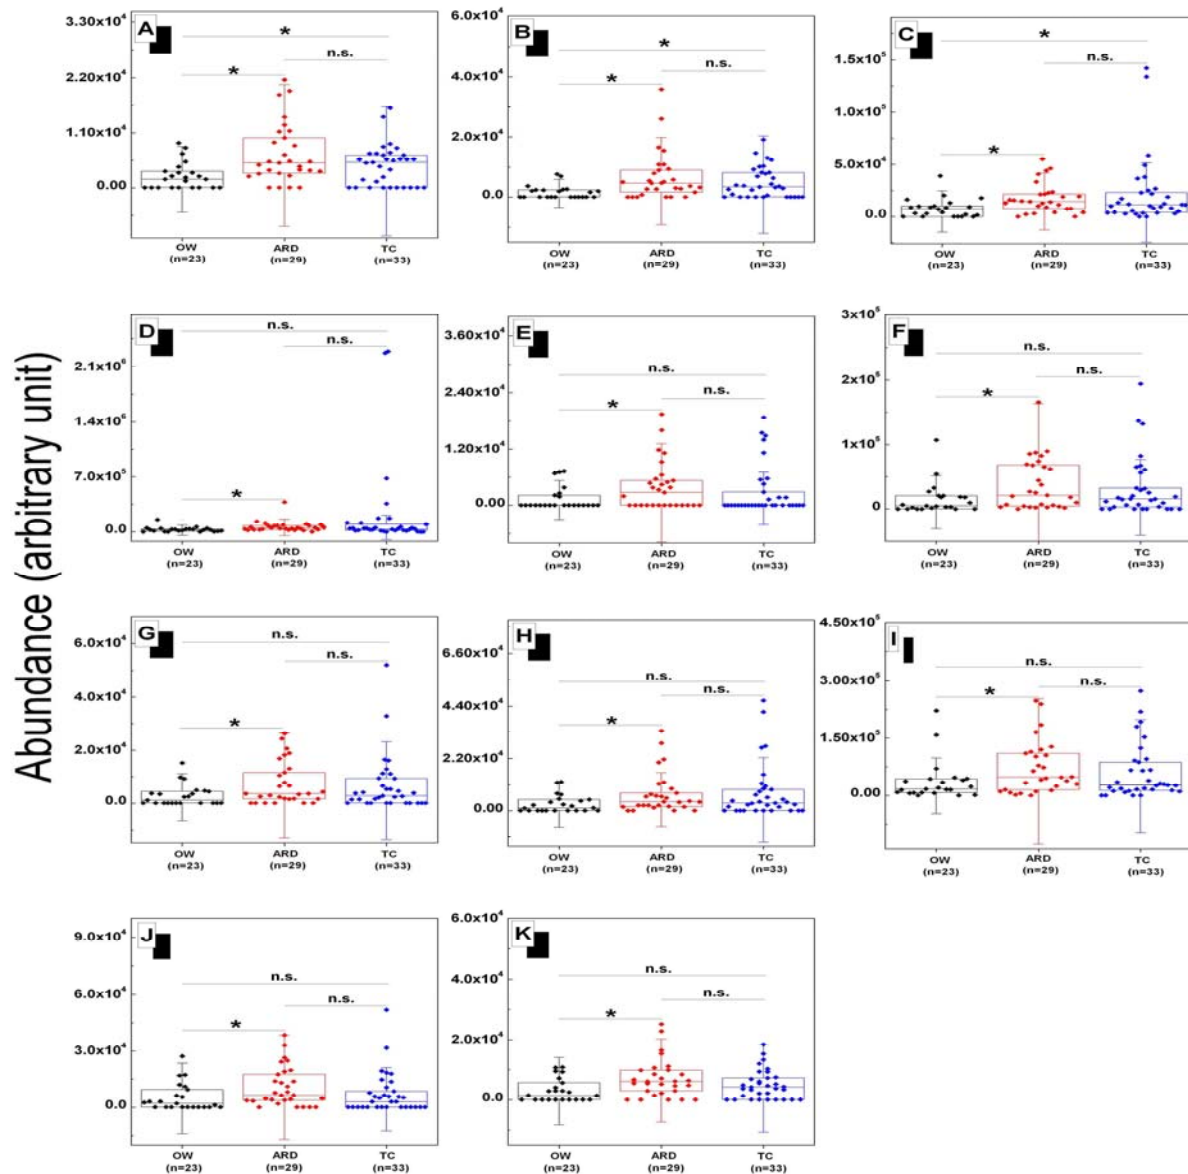

50

51 **Figure S2:** Difference in abundances of individual important metabolites in all study subjects  
 52 belonging to three study groups (office worker: OW; auto rickshaw driver: ARD; and traffic cop:  
 53 TC). Box and whisker plots showing difference in abundances of 11 important metabolites (A)  
 54 2-hydroxy valerate, (B) Histidine, (C) Cis-aconitic acid, (D) Kynurenine, (E) 4-amino hippuric  
 55 acid, (F) Phenylalanine, (G) Isoleucine, (H) Alanine, (I) Proline, (J) P-cresol sulfate and (K)  
 56 Benzoic acid in all three study groups (\*:  $p$  value < 0.05 of Wilcoxon-Mann-Whitney test and  
 57 n.s. are not significant at 95% confidence). Black diamond shows OW subjects, red for ARD and  
 58 blue diamond's for TC. Number of subjects used in this study is presented in parenthesis.

59

60

61 **Table S1.** Annual (Aug 2013 to July 2014) PM<sub>2.5</sub> concentration as tabulated from one of the  
62 station of the study area.

63 **Table S2.** Annual (Aug 2013 to July 2014) PM<sub>10</sub> concentration as tabulated from one of the  
64 station of the study area.

65
